# Supplementary material
Source: PubMed Central journal article supplement (PMC2710000)
Supplement: NIHMS108683-supplement-1_si_001.pdf [file NIHMS108683-supplement-1_si_001.pdf]

## **Supporting Information**

### **Theoretical Analysis of the Unusual Temperature Dependence of the Kinetic Isotope Effect in Quinol Oxidation**

Michelle K. Ludlow, Alexander V. Soudackov, and Sharon Hammes-Schiffer\*

*Department of Chemistry, 104 Chemistry Building, Pennsylvania State University,  
University Park, PA 16802; shs@chem.psu.edu*

**Table S1. Structures of the truncated gas phase models**

a) UQH<sub>2</sub> optimized structure of the truncated gas phase model calculated at the B3LYP/6-31G\*\* level. The total energy is -1277.51381485 Hartrees.

| group | atom | x      | y      | z      | group | atom | x      | y      | z      |
|-------|------|--------|--------|--------|-------|------|--------|--------|--------|
| PBIM  | C    | -3.112 | -1.213 | 0.317  | UQH2  | C    | 3.665  | -0.404 | 0.040  |
| PBIM  | C    | -4.265 | -0.605 | -0.254 | UQH2  | C    | 1.335  | -0.849 | 0.688  |
| PBIM  | C    | -5.444 | -1.353 | -0.402 | UQH2  | C    | 3.725  | -1.597 | -0.690 |
| PBIM  | C    | -5.441 | -2.677 | 0.021  | UQH2  | C    | 1.454  | -2.054 | -0.055 |
| PBIM  | C    | -4.288 | -3.265 | 0.587  | UQH2  | C    | 2.612  | -2.441 | -0.737 |
| PBIM  | C    | -3.108 | -2.546 | 0.745  | UQH2  | H    | 0.578  | -2.699 | -0.088 |
| PBIM  | C    | -2.728 | 0.880  | -0.221 | UQH2  | O    | 0.248  | -0.500 | 1.329  |
| PBIM  | H    | -6.328 | -0.896 | -0.838 | UQH2  | O    | 4.897  | -1.940 | -1.345 |
| PBIM  | H    | -6.343 | -3.277 | -0.084 | UQH2  | H    | 5.516  | -1.231 | -1.105 |
| PBIM  | H    | -4.326 | -4.304 | 0.907  | UQH2  | O    | 4.844  | 0.348  | 0.068  |
| PBIM  | H    | -2.220 | -2.990 | 1.184  | UQH2  | O    | 2.499  | 1.195  | 1.385  |
| PBIM  | N    | -2.146 | -0.243 | 0.325  | UQH2  | C    | 4.746  | 1.628  | -0.557 |
| PBIM  | N    | -3.996 | 0.704  | -0.581 | UQH2  | H    | 4.050  | 2.272  | -0.012 |
| PBIM  | C    | -1.982 | 2.146  | -0.371 | UQH2  | H    | 5.750  | 2.064  | -0.534 |
| PBIM  | C    | -1.944 | 4.302  | -1.156 | UQH2  | H    | 4.415  | 1.538  | -1.600 |
| PBIM  | C    | -0.002 | 3.473  | -0.038 | UQH2  | C    | 2.299  | 1.076  | 2.795  |
| PBIM  | C    | -0.643 | 4.521  | -0.698 | UQH2  | H    | 2.262  | 2.095  | 3.192  |
| PBIM  | H    | -2.481 | 5.097  | -1.675 | UQH2  | H    | 1.360  | 0.555  | 2.999  |
| PBIM  | H    | 1.012  | 3.571  | 0.340  | UQH2  | H    | 3.138  | 0.540  | 3.263  |
| PBIM  | H    | -0.157 | 5.479  | -0.859 | UQH2  | C    | 2.684  | -3.731 | -1.517 |
| PBIM  | C    | -0.675 | 2.269  | 0.137  | UQH2  | H    | 2.891  | -3.550 | -2.580 |
| PBIM  | H    | -0.196 | 1.442  | 0.657  | UQH2  | H    | 3.490  | -4.379 | -1.152 |
| PBIM  | N    | -2.609 | 3.155  | -1.009 | UQH2  | H    | 1.742  | -4.282 | -1.444 |
| UQH2  | C    | 2.503  | -0.025 | 0.718  | UQH2  | H    | -1.140 | -0.381 | 0.689  |

b) PQH<sub>2</sub> optimized structure of the truncated gas phase model calculated at the B3LP/6-31G\*\* level. The total energy is -1127.10462272 Hartrees.

| group | atom | x      | y      | z      | group | atom | x     | y      | z      |
|-------|------|--------|--------|--------|-------|------|-------|--------|--------|
| PBIM  | C    | -1.885 | 1.791  | -0.452 | PQH2  | C    | 3.019 | -0.816 | -1.030 |
| PBIM  | C    | -3.253 | 1.907  | -0.073 | PQH2  | C    | 4.250 | -0.510 | -0.422 |
| PBIM  | C    | -3.867 | 3.170  | -0.050 | PQH2  | C    | 1.796 | -0.313 | -0.481 |
| PBIM  | C    | -3.104 | 4.278  | -0.403 | PQH2  | C    | 4.287 | 0.313  | 0.714  |
| PBIM  | C    | -1.747 | 4.148  | -0.774 | PQH2  | C    | 1.896 | 0.498  | 0.679  |
| PBIM  | C    | -1.116 | 2.908  | -0.805 | PQH2  | C    | 3.113 | 0.823  | 1.277  |
| PBIM  | C    | -2.740 | -0.163 | 0.032  | PQH2  | H    | 0.976 | 0.884  | 1.113  |
| PBIM  | H    | -4.910 | 3.265  | 0.238  | PQH2  | O    | 0.643 | -0.601 | -1.043 |
| PBIM  | H    | -3.556 | 5.267  | -0.392 | PQH2  | O    | 5.491 | 0.642  | 1.346  |
| PBIM  | H    | -1.183 | 5.038  | -1.040 | PQH2  | H    | 6.206 | 0.462  | 0.725  |
| PBIM  | H    | -0.072 | 2.804  | -1.084 | PQH2  | C    | 3.182 | 1.697  | 2.506  |

|      |   |        |        |        |      |   |        |        |        |
|------|---|--------|--------|--------|------|---|--------|--------|--------|
| PBIM | N | -1.581 | 0.457  | -0.376 | PQH2 | H | 3.591  | 1.155  | 3.368  |
| PBIM | N | -3.764 | 0.666  | 0.225  | PQH2 | H | 3.840  | 2.561  | 2.347  |
| PBIM | C | -2.812 | -1.624 | 0.230  | PQH2 | H | 2.188  | 2.066  | 2.776  |
| PBIM | C | -4.081 | -3.442 | 0.836  | PQH2 | H | -0.583 | 0.018  | -0.630 |
| PBIM | C | -1.812 | -3.813 | 0.194  | PQH2 | C | 5.560  | -1.046 | -0.965 |
| PBIM | C | -3.031 | -4.337 | 0.627  | PQH2 | H | 6.171  | -0.264 | -1.445 |
| PBIM | H | -5.051 | -3.809 | 1.175  | PQH2 | H | 6.174  | -1.492 | -0.171 |
| PBIM | H | -0.960 | -4.463 | 0.015  | PQH2 | H | 5.399  | -1.819 | -1.718 |
| PBIM | H | -3.167 | -5.401 | 0.799  | PQH2 | C | 2.925  | -1.674 | -2.271 |
| PBIM | C | -1.691 | -2.443 | -0.010 | PQH2 | H | 1.880  | -1.694 | -2.588 |
| PBIM | H | -0.750 | -2.012 | -0.352 | PQH2 | H | 3.533  | -1.288 | -3.100 |
| PBIM | N | -3.993 | -2.125 | 0.649  | PQH2 | H | 3.245  | -2.712 | -2.096 |

**Table S2. Structures of the truncated solvated models**

a) UQH<sub>2</sub> optimized structure of the truncated solvated model calculated at the B3LYP/6-31G\*\* level with PCM for acetonitrile. The total energy is -1277.57971768 Hartrees.

| group | atom | x      | y      | z      | group | atom | x      | y      | z      |
|-------|------|--------|--------|--------|-------|------|--------|--------|--------|
| PBIM  | C    | 2.417  | -1.708 | -0.231 | UQH2  | C    | -3.869 | -0.121 | 0.136  |
| PBIM  | C    | 3.763  | -1.591 | 0.238  | UQH2  | C    | -1.501 | -0.123 | -0.402 |
| PBIM  | C    | 4.517  | -2.746 | 0.519  | UQH2  | C    | -3.573 | -0.040 | 1.504  |
| PBIM  | C    | 3.917  | -3.986 | 0.330  | UQH2  | C    | -1.229 | -0.049 | 0.973  |
| PBIM  | C    | 2.584  | -4.096 | -0.132 | UQH2  | C    | -2.243 | -0.012 | 1.937  |
| PBIM  | C    | 1.822  | -2.968 | -0.416 | UQH2  | H    | -0.191 | -0.022 | 1.288  |
| PBIM  | C    | 2.973  | 0.363  | -0.076 | UQH2  | O    | -0.536 | -0.151 | -1.353 |
| PBIM  | H    | 5.542  | -2.665 | 0.874  | UQH2  | O    | -4.594 | -0.007 | 2.423  |
| PBIM  | H    | 4.480  | -4.892 | 0.540  | UQH2  | H    | -5.414 | -0.089 | 1.907  |
| PBIM  | H    | 2.151  | -5.084 | -0.267 | UQH2  | O    | -5.214 | -0.209 | -0.190 |
| PBIM  | H    | 0.798  | -3.052 | -0.772 | UQH2  | O    | -3.188 | -0.221 | -2.158 |
| PBIM  | N    | 1.927  | -0.443 | -0.428 | UQH2  | C    | -5.734 | 0.887  | -0.960 |
| PBIM  | N    | 4.096  | -0.263 | 0.330  | UQH2  | H    | -5.264 | 0.922  | -1.945 |
| PBIM  | C    | 2.863  | 1.834  | -0.156 | UQH2  | H    | -6.806 | 0.708  | -1.063 |
| PBIM  | C    | 3.813  | 3.900  | 0.224  | UQH2  | H    | -5.573 | 1.840  | -0.441 |
| PBIM  | C    | 1.642  | 3.827  | -0.765 | UQH2  | C    | -2.874 | -1.461 | -2.800 |
| PBIM  | C    | 2.715  | 4.586  | -0.294 | UQH2  | H    | -3.210 | -1.366 | -3.836 |
| PBIM  | H    | 4.671  | 4.456  | 0.602  | UQH2  | H    | -1.798 | -1.650 | -2.777 |
| PBIM  | H    | 0.762  | 4.310  | -1.181 | UQH2  | H    | -3.407 | -2.294 | -2.324 |
| PBIM  | H    | 2.704  | 5.671  | -0.326 | UQH2  | C    | -1.934 | 0.069  | 3.412  |
| PBIM  | C    | 1.713  | 2.440  | -0.698 | UQH2  | H    | -2.375 | 0.964  | 3.866  |
| PBIM  | H    | 0.898  | 1.826  | -1.060 | UQH2  | H    | -2.346 | -0.789 | 3.955  |
| PBIM  | N    | 3.902  | 2.568  | 0.299  | UQH2  | H    | -0.855 | 0.096  | 3.584  |
| UQH2  | C    | -2.847 | -0.169 | -0.820 | UQH2  | H    | 0.403  | -0.242 | -0.944 |

b) PQH<sub>2</sub> optimized structure of the truncated solvated model calculated at the B3LP/6-31G\*\* level with PCM for acetonitrile. The total energy is -1127.19165281 Hartrees.

| group | atom | x     | y      | z      | group | atom | x      | y      | z      |
|-------|------|-------|--------|--------|-------|------|--------|--------|--------|
| PBIM  | C    | 2.103 | -1.693 | -0.428 | PQH2  | C    | -3.158 | 0.121  | -1.223 |
| PBIM  | C    | 3.409 | -1.626 | 0.152  | PQH2  | C    | -4.259 | 0.023  | -0.348 |
| PBIM  | C    | 4.155 | -2.802 | 0.359  | PQH2  | C    | -1.856 | -0.070 | -0.715 |
| PBIM  | C    | 3.587 | -4.016 | -0.014 | PQH2  | C    | -4.049 | -0.298 | 1.004  |
| PBIM  | C    | 2.293 | -4.077 | -0.586 | PQH2  | C    | -1.672 | -0.359 | 0.646  |
| PBIM  | C    | 1.539 | -2.927 | -0.797 | PQH2  | C    | -2.756 | -0.484 | 1.516  |
| PBIM  | C    | 2.619 | 0.349  | -0.003 | PQH2  | H    | -0.661 | -0.500 | 1.017  |
| PBIM  | H    | 5.151 | -2.757 | 0.799  | PQH2  | O    | -0.804 | 0.039  | -1.569 |
| PBIM  | H    | 4.145 | -4.939 | 0.135  | PQH2  | O    | -5.116 | -0.372 | 1.898  |
| PBIM  | H    | 1.883 | -5.047 | -0.864 | PQH2  | H    | -5.679 | -1.142 | 1.672  |
| PBIM  | H    | 0.546 | -2.980 | -1.238 | PQH2  | C    | -2.553 | -0.814 | 2.974  |
| PBIM  | N    | 1.615 | -0.415 | -0.523 | PQH2  | H    | -2.866 | 0.014  | 3.622  |
| PBIM  | N    | 3.717 | -0.314 | 0.416  | PQH2  | H    | -3.150 | -1.682 | 3.274  |
| PBIM  | C    | 2.504 | 1.821  | 0.075  | PQH2  | H    | -1.502 | -1.028 | 3.184  |
| PBIM  | C    | 3.414 | 3.828  | 0.760  | PQH2  | H    | 0.088  | -0.138 | -1.107 |
| PBIM  | C    | 1.324 | 3.875  | -0.396 | PQH2  | C    | -5.664 | 0.263  | -0.852 |
| PBIM  | C    | 2.355 | 4.572  | 0.239  | PQH2  | H    | -6.065 | -0.612 | -1.381 |
| PBIM  | H    | 4.240 | 4.335  | 1.264  | PQH2  | H    | -6.337 | 0.481  | -0.020 |
| PBIM  | H    | 0.475 | 4.408  | -0.822 | PQH2  | H    | -5.701 | 1.101  | -1.554 |
| PBIM  | H    | 2.342 | 5.655  | 0.328  | PQH2  | C    | -3.357 | 0.435  | -2.688 |
| PBIM  | C    | 1.396 | 2.489  | -0.480 | PQH2  | H    | -2.417 | 0.324  | -3.231 |
| PBIM  | H    | 0.612 | 1.923  | -0.970 | PQH2  | H    | -4.101 | -0.226 | -3.147 |
| PBIM  | N    | 3.502 | 2.494  | 0.690  | PQH2  | H    | -3.710 | 1.464  | -2.842 |

**Table S3. Structures of the full system gas phase models**

a) UQH<sub>2</sub> optimized structure of the full system gas phase model calculated at the B3LYP/LANL2DZ level. The total energy is -2361.70495900 Hartrees.

| group | atom | x      | y      | z     | group | atom | x     | Y     | z      |
|-------|------|--------|--------|-------|-------|------|-------|-------|--------|
| PBIM  | C    | -1.451 | 1.431  | 1.214 | BPY   | C    | 5.027 | 3.683 | 1.465  |
| PBIM  | C    | -0.021 | 1.614  | 1.252 | BPY   | H    | 5.387 | 2.509 | 3.266  |
| PBIM  | C    | 0.548  | 2.687  | 1.976 | BPY   | C    | 3.650 | 2.550 | -0.188 |
| PBIM  | C    | -0.323 | 3.554  | 2.644 | BPY   | C    | 4.390 | 3.677 | 0.216  |
| PBIM  | C    | -1.739 | 3.373  | 2.604 | BPY   | H    | 5.597 | 4.548 | 1.787  |
| PBIM  | C    | -2.317 | 2.316  | 1.895 | BPY   | C    | 2.948 | 2.443 | -1.480 |
| PBIM  | C    | -0.535 | -0.159 | 0.046 | BPY   | H    | 4.469 | 4.541 | -0.434 |
| PBIM  | H    | 1.622  | 2.837  | 2.023 | BPY   | C    | 2.890 | 3.477 | -2.433 |
| PBIM  | H    | 0.083  | 4.389  | 3.211 | BPY   | C    | 2.183 | 3.283 | -3.629 |
| PBIM  | H    | -2.375 | 4.073  | 3.139 | BPY   | H    | 3.378 | 4.425 | -2.243 |
| PBIM  | H    | -3.392 | 2.171  | 1.865 | BPY   | C    | 1.631 | 1.055 | -2.863 |
| PBIM  | N    | -1.744 | 0.305  | 0.446 | BPY   | C    | 1.542 | 2.048 | -3.846 |

|      |    |        |        |        |      |   |         |        |        |
|------|----|--------|--------|--------|------|---|---------|--------|--------|
| PBIM | N  | 0.540  | 0.583  | 0.499  | BPY  | H | 2.125   | 4.076  | -4.368 |
| PBIM | C  | -0.258 | -1.331 | -0.769 | BPY  | H | 1.141   | 0.098  | -2.989 |
| PBIM | C  | 1.457  | -2.622 | -1.758 | BPY  | H | 0.975   | 1.858  | -4.751 |
| PBIM | C  | -0.849 | -3.300 | -2.050 | BPY  | N | 2.624   | -1.440 | 1.476  |
| PBIM | C  | 0.524  | -3.518 | -2.295 | BPY  | N | 4.164   | -1.131 | -0.651 |
| PBIM | H  | 2.519  | -2.755 | -1.924 | BPY  | N | 2.320   | 1.236  | -1.702 |
| PBIM | H  | -1.594 | -3.980 | -2.453 | BPY  | N | 3.537   | 1.447  | 0.631  |
| PBIM | H  | 0.867  | -4.361 | -2.886 | UQH2 | H | -5.958  | -4.334 | -0.387 |
| PBIM | C  | -1.246 | -2.199 | -1.279 | UQH2 | C | -5.836  | -3.318 | -0.771 |
| PBIM | H  | -2.293 | -2.002 | -1.066 | UQH2 | O | -6.371  | -2.436 | 0.272  |
| PBIM | N  | 1.085  | -1.545 | -1.012 | UQH2 | H | -4.778  | -3.097 | -0.943 |
| RU   | Ru | 2.401  | -0.126 | -0.127 | UQH2 | H | -6.407  | -3.199 | -1.702 |
| BPY  | H  | 3.179  | -4.109 | 4.258  | UQH2 | C | -6.371  | -1.062 | -0.025 |
| BPY  | C  | 3.025  | -3.363 | 3.485  | UQH2 | C | -5.180  | -0.323 | -0.220 |
| BPY  | C  | 1.931  | -2.479 | 3.546  | UQH2 | C | -7.606  | -0.384 | -0.069 |
| BPY  | C  | 3.916  | -3.268 | 2.405  | UQH2 | C | -5.255  | 1.060  | -0.489 |
| BPY  | C  | 1.761  | -1.534 | 2.526  | UQH2 | O | -3.959  | -0.994 | -0.165 |
| BPY  | H  | 1.216  | -2.519 | 4.361  | UQH2 | C | -7.660  | 1.002  | -0.331 |
| BPY  | C  | 3.701  | -2.298 | 1.408  | UQH2 | O | -8.859  | -1.012 | 0.065  |
| BPY  | H  | 4.762  | -3.943 | 2.342  | UQH2 | C | -6.485  | 1.746  | -0.545 |
| BPY  | H  | 0.933  | -0.837 | 2.525  | UQH2 | H | -4.334  | 1.610  | -0.670 |
| BPY  | C  | 4.575  | -2.108 | 0.233  | UQH2 | O | -8.901  | 1.646  | -0.390 |
| BPY  | C  | 5.755  | -2.842 | 0.001  | UQH2 | C | -9.106  | -1.778 | 1.301  |
| BPY  | C  | 4.921  | -0.880 | -1.757 | UQH2 | C | -6.570  | 3.230  | -0.833 |
| BPY  | C  | 6.526  | -2.582 | -1.141 | UQH2 | H | -9.608  | 0.969  | -0.284 |
| BPY  | H  | 6.070  | -3.606 | 0.702  | UQH2 | H | -10.124 | -2.162 | 1.205  |
| BPY  | C  | 6.100  | -1.580 | -2.036 | UQH2 | H | -8.386  | -2.596 | 1.383  |
| BPY  | H  | 4.556  | -0.105 | -2.420 | UQH2 | H | -9.032  | -1.118 | 2.176  |
| BPY  | H  | 7.436  | -3.142 | -1.329 | UQH2 | H | -7.174  | 3.423  | -1.728 |
| BPY  | H  | 6.667  | -1.345 | -2.931 | UQH2 | H | -7.061  | 3.764  | -0.009 |
| BPY  | C  | 4.162  | 1.455  | 1.841  | UQH2 | H | -5.573  | 3.660  | -0.984 |
| BPY  | C  | 4.912  | 2.548  | 2.292  | UQH2 | H | -3.168  | -0.398 | 0.105  |
| BPY  | H  | 4.040  | 0.570  | 2.452  |      |   |         |        |        |

b) PQH<sub>2</sub> optimized structure of the full system gas phase model calculated at the B3LYP/LANL2DZ level. The total energy is -2211.31950965 Hartrees.

| group | atom | x      | y     | z     | group | atom | x     | Y     | z      |
|-------|------|--------|-------|-------|-------|------|-------|-------|--------|
| PBIM  | C    | -1.628 | 1.211 | 1.804 | BPY   | H    | 4.052 | 0.724 | 2.080  |
| PBIM  | C    | -0.223 | 1.475 | 1.613 | BPY   | C    | 4.636 | 3.881 | 0.926  |
| PBIM  | C    | 0.390  | 2.591 | 2.226 | BPY   | H    | 5.391 | 2.758 | 2.635  |
| PBIM  | C    | -0.414 | 3.423 | 3.014 | BPY   | C    | 3.061 | 2.639 | -0.449 |
| PBIM  | C    | -1.806 | 3.163 | 3.200 | BPY   | C    | 3.786 | 3.817 | -0.187 |
| PBIM  | C    | -2.426 | 2.062 | 2.602 | BPY   | H    | 5.196 | 4.786 | 1.138  |

|      |    |        |        |        |      |   |        |        |        |
|------|----|--------|--------|--------|------|---|--------|--------|--------|
| PBIM | C  | -0.819 | -0.347 | 0.521  | BPY  | C | 2.143  | 2.469  | -1.590 |
| PBIM | H  | 1.447  | 2.803  | 2.099  | BPY  | H | 3.688  | 4.676  | -0.841 |
| PBIM | H  | 0.028  | 4.289  | 3.500  | BPY  | C | 1.839  | 3.485  | -2.515 |
| PBIM | H  | -2.389 | 3.838  | 3.821  | BPY  | C | 0.937  | 3.230  | -3.559 |
| PBIM | H  | -3.483 | 1.857  | 2.743  | BPY  | H | 2.287  | 4.467  | -2.418 |
| PBIM | N  | -1.975 | 0.057  | 1.104  | BPY  | C | 0.689  | 0.979  | -2.705 |
| PBIM | N  | 0.269  | 0.462  | 0.789  | BPY  | C | 0.353  | 1.952  | -3.654 |
| PBIM | C  | -0.607 | -1.510 | -0.326 | BPY  | H | 0.689  | 4.008  | -4.274 |
| PBIM | C  | 0.996  | -2.696 | -1.595 | BPY  | H | 0.252  | -0.010 | -2.736 |
| PBIM | C  | -1.272 | -3.533 | -1.481 | BPY  | H | -0.359 | 1.713  | -4.437 |
| PBIM | C  | 0.050  | -3.661 | -1.960 | BPY  | N | 2.646  | -1.391 | 1.368  |
| PBIM | H  | 2.020  | -2.757 | -1.944 | BPY  | N | 3.738  | -0.999 | -1.007 |
| PBIM | H  | -2.028 | -4.266 | -1.747 | BPY  | N | 1.568  | 1.220  | -1.692 |
| PBIM | H  | 0.343  | -4.487 | -2.599 | BPY  | N | 3.173  | 1.541  | 0.377  |
| PBIM | C  | -1.606 | -2.450 | -0.656 | PQH2 | C | -6.567 | -1.521 | 0.253  |
| PBIM | H  | -2.615 | -2.317 | -0.270 | PQH2 | C | -5.388 | -0.740 | 0.304  |
| PBIM | N  | 0.686  | -1.636 | -0.798 | PQH2 | C | -7.760 | -0.913 | -0.218 |
| Ru   | Ru | 2.035  | -0.117 | -0.164 | PQH2 | C | -5.395 | 0.613  | -0.096 |
| BPY  | H  | 3.903  | -3.969 | 4.002  | PQH2 | O | -4.210 | -1.351 | 0.748  |
| BPY  | C  | 3.554  | -3.248 | 3.270  | PQH2 | C | -7.741 | 0.446  | -0.607 |
| BPY  | C  | 2.428  | -2.444 | 3.533  | PQH2 | C | -6.572 | 1.230  | -0.554 |
| BPY  | C  | 4.219  | -3.106 | 2.042  | PQH2 | H | -4.473 | 1.189  | -0.053 |
| BPY  | C  | 2.002  | -1.530 | 2.561  | PQH2 | O | -8.898 | 1.104  | -1.083 |
| BPY  | H  | 1.883  | -2.524 | 4.467  | PQH2 | C | -6.602 | 2.682  | -0.981 |
| BPY  | C  | 3.751  | -2.169 | 1.101  | PQH2 | H | -9.687 | 0.529  | -1.055 |
| BPY  | H  | 5.086  | -3.720 | 1.824  | PQH2 | H | -6.928 | 2.781  | -2.024 |
| BPY  | H  | 1.140  | -0.893 | 2.711  | PQH2 | H | -7.320 | 3.255  | -0.380 |
| BPY  | C  | 4.375  | -1.934 | -0.216 | PQH2 | H | -5.613 | 3.143  | -0.876 |
| BPY  | C  | 5.539  | -2.588 | -0.665 | PQH2 | H | -3.441 | -0.708 | 0.936  |
| BPY  | C  | 4.255  | -0.711 | -2.235 | PQH2 | C | -9.070 | -1.682 | -0.312 |
| BPY  | C  | 6.064  | -2.289 | -1.931 | PQH2 | H | -9.848 | -1.244 | 0.333  |
| BPY  | H  | 6.033  | -3.319 | -0.036 | PQH2 | H | -9.459 | -1.698 | -1.342 |
| BPY  | C  | 5.408  | -1.331 | -2.730 | PQH2 | H | -8.953 | -2.722 | -0.002 |
| BPY  | H  | 3.717  | 0.027  | -2.818 | PQH2 | C | -6.524 | -2.970 | 0.705  |
| BPY  | H  | 6.960  | -2.788 | -2.287 | PQH2 | H | -7.249 | -3.166 | 1.507  |
| BPY  | H  | 5.779  | -1.069 | -3.715 | PQH2 | H | -6.752 | -3.663 | -0.118 |
| BPY  | C  | 4.004  | 1.607  | 1.455  | PQH2 | H | -5.528 | -3.207 | 1.085  |
| BPY  | C  | 4.747  | 2.753  | 1.762  |      |   |        |        |        |

**Table S4. Structures of the superimposed full system models**

a) UQH<sub>2</sub> structure of the superimposed full system model used for calculating solvent reorganization energy and proton potential energy curves.

| group | atom | x | y | z | group | atom | x | y | z |
|-------|------|---|---|---|-------|------|---|---|---|
|-------|------|---|---|---|-------|------|---|---|---|

|      |    |        |        |        |      |   |        |        |        |
|------|----|--------|--------|--------|------|---|--------|--------|--------|
| PBIM | C  | 0.000  | 0.000  | 0.000  | BPY  | C | 6.961  | 1.097  | -0.562 |
| PBIM | C  | 1.430  | 0.000  | 0.000  | BPY  | H | 6.923  | 1.291  | 1.621  |
| PBIM | C  | 2.137  | 1.217  | 0.000  | BPY  | C | 5.428  | -0.593 | -1.424 |
| PBIM | C  | 1.409  | 2.402  | -0.002 | BPY  | C | 6.410  | 0.408  | -1.641 |
| PBIM | C  | -0.006 | 2.396  | -0.003 | BPY  | H | 7.713  | 1.864  | -0.724 |
| PBIM | C  | -0.724 | 1.205  | -0.003 | BPY  | C | 4.754  | -1.328 | -2.481 |
| PBIM | C  | 0.744  | -2.017 | 0.007  | BPY  | H | 6.729  | 0.639  | -2.652 |
| PBIM | H  | 3.225  | 1.225  | 0.001  | BPY  | C | 4.982  | -1.135 | -3.867 |
| PBIM | H  | 1.933  | 3.355  | -0.002 | BPY  | C | 4.225  | -1.837 | -4.807 |
| PBIM | H  | -0.539 | 3.344  | -0.004 | BPY  | H | 5.740  | -0.433 | -4.198 |
| PBIM | H  | -1.811 | 1.200  | -0.003 | BPY  | C | 3.045  | -2.899 | -2.977 |
| PBIM | N  | -0.423 | -1.304 | 0.006  | BPY  | C | 3.225  | -2.734 | -4.353 |
| PBIM | N  | 1.882  | -1.295 | 0.004  | BPY  | H | 4.395  | -1.690 | -5.870 |
| PBIM | C  | 0.735  | -3.494 | 0.025  | BPY  | H | 2.296  | -3.578 | -2.588 |
| PBIM | C  | 1.922  | -5.468 | -0.050 | BPY  | H | 2.601  | -3.287 | -5.048 |
| PBIM | C  | -0.450 | -5.593 | 0.169  | BPY  | N | 3.757  | -2.604 | 2.089  |
| PBIM | C  | 0.775  | -6.253 | 0.067  | BPY  | N | 5.236  | -3.769 | 0.220  |
| PBIM | H  | 2.900  | -5.945 | -0.132 | BPY  | N | 3.793  | -2.238 | -2.049 |
| PBIM | H  | -1.376 | -6.155 | 0.264  | BPY  | N | 5.011  | -0.896 | -0.130 |
| PBIM | H  | 0.844  | -7.337 | 0.079  | UQH2 | C | -5.022 | -1.939 | -1.202 |
| PBIM | C  | -0.476 | -4.204 | 0.149  | UQH2 | C | -5.666 | -2.022 | -2.442 |
| PBIM | H  | -1.412 | -3.665 | 0.231  | UQH2 | C | -3.614 | -1.871 | -1.153 |
| PBIM | N  | 1.922  | -4.131 | -0.072 | UQH2 | C | -4.933 | -2.026 | -3.636 |
| RU   | Ru | 3.646  | -2.441 | 0.013  | UQH2 | C | -2.901 | -1.869 | -2.363 |
| BPY  | H  | 4.326  | -2.990 | 5.932  | UQH2 | C | -3.537 | -1.941 | -3.608 |
| BPY  | C  | 4.166  | -2.890 | 4.862  | UQH2 | H | -1.819 | -1.807 | -2.318 |
| BPY  | C  | 3.063  | -2.144 | 4.365  | UQH2 | O | -3.020 | -1.811 | 0.063  |
| BPY  | C  | 5.039  | -3.498 | 3.962  | UQH2 | O | -5.590 | -2.097 | -4.841 |
| BPY  | C  | 2.902  | -2.031 | 2.982  | UQH2 | H | -6.538 | -2.095 | -4.623 |
| BPY  | H  | 2.356  | -1.662 | 5.031  | UQH2 | O | -7.047 | -2.047 | -2.576 |
| BPY  | C  | 4.829  | -3.367 | 2.560  | UQH2 | O | -5.785 | -1.967 | -0.050 |
| BPY  | H  | 5.880  | -4.077 | 4.328  | UQH2 | C | -7.698 | -3.208 | -2.037 |
| BPY  | H  | 2.086  | -1.460 | 2.553  | UQH2 | H | -7.576 | -3.248 | -0.952 |
| BPY  | C  | 5.634  | -4.005 | 1.543  | UQH2 | H | -8.756 | -3.111 | -2.291 |
| BPY  | C  | 6.742  | -4.859 | 1.806  | UQH2 | H | -7.299 | -4.125 | -2.488 |
| BPY  | C  | 5.919  | -4.376 | -0.793 | UQH2 | C | -5.802 | -0.734 | 0.677  |
| BPY  | C  | 7.429  | -5.467 | 0.759  | UQH2 | H | -6.450 | -0.895 | 1.542  |
| BPY  | H  | 7.050  | -5.039 | 2.831  | UQH2 | H | -4.796 | -0.467 | 1.013  |
| BPY  | C  | 7.006  | -5.224 | -0.580 | UQH2 | H | -6.216 | 0.076  | 0.064  |
| BPY  | H  | 5.570  | -4.156 | -1.796 | UQH2 | C | -2.757 | -1.939 | -4.899 |
| BPY  | H  | 8.275  | -6.118 | 0.961  | UQH2 | H | -2.949 | -2.844 | -5.486 |
| BPY  | H  | 7.517  | -5.672 | -1.426 | UQH2 | H | -3.037 | -1.091 | -5.535 |
| BPY  | C  | 5.555  | -0.212 | 0.916  | UQH2 | H | -1.682 | -1.880 | -4.706 |

|     |   |       |        |       |      |   |        |        |        |
|-----|---|-------|--------|-------|------|---|--------|--------|--------|
| BPY | C | 6.521 | 0.782  | 0.751 | UQH2 | H | -2.009 | -1.636 | -0.012 |
| BPY | H | 5.192 | -0.484 | 1.900 |      |   |        |        |        |

b) PQH<sub>2</sub> structure of the superimposed full system model used for calculating solvent reorganization energy and proton potential energy curves.

| group | atom | x      | y      | z      | group | atom | x      | y      | z      |
|-------|------|--------|--------|--------|-------|------|--------|--------|--------|
| PBIM  | C    | 0.000  | 0.000  | 0.000  | BPY   | H    | 5.245  | -0.503 | 1.810  |
| PBIM  | C    | 1.430  | 0.000  | 0.000  | BPY   | C    | 6.947  | 1.092  | -0.689 |
| PBIM  | C    | 2.141  | 1.215  | 0.000  | BPY   | H    | 6.973  | 1.269  | 1.495  |
| PBIM  | C    | 1.414  | 2.402  | -0.001 | BPY   | C    | 5.385  | -0.586 | -1.520 |
| PBIM  | C    | -0.002 | 2.397  | -0.003 | BPY   | C    | 6.363  | 0.414  | -1.758 |
| PBIM  | C    | -0.722 | 1.207  | -0.005 | BPY   | H    | 7.696  | 1.859  | -0.867 |
| PBIM  | C    | 0.738  | -2.018 | 0.010  | BPY   | C    | 4.678  | -1.310 | -2.562 |
| PBIM  | H    | 3.230  | 1.222  | 0.002  | BPY   | H    | 6.652  | 0.654  | -2.775 |
| PBIM  | H    | 1.940  | 3.355  | -0.001 | BPY   | C    | 4.865  | -1.107 | -3.953 |
| PBIM  | H    | -0.535 | 3.346  | -0.005 | BPY   | C    | 4.076  | -1.797 | -4.875 |
| PBIM  | H    | -1.811 | 1.209  | -0.005 | BPY   | H    | 5.617  | -0.407 | -4.300 |
| PBIM  | N    | -0.425 | -1.305 | 0.011  | BPY   | C    | 2.944  | -2.865 | -3.019 |
| PBIM  | N    | 1.879  | -1.298 | 0.006  | BPY   | C    | 3.083  | -2.690 | -4.398 |
| PBIM  | C    | 0.734  | -3.496 | 0.031  | BPY   | H    | 4.214  | -1.642 | -5.941 |
| PBIM  | C    | 1.936  | -5.465 | -0.040 | BPY   | H    | 2.201  | -3.542 | -2.613 |
| PBIM  | C    | -0.438 | -5.603 | 0.182  | BPY   | H    | 2.434  | -3.232 | -5.079 |
| PBIM  | C    | 0.793  | -6.255 | 0.081  | BPY   | N    | 3.823  | -2.627 | 2.023  |
| PBIM  | H    | 2.918  | -5.935 | -0.122 | BPY   | N    | 5.233  | -3.780 | 0.094  |
| PBIM  | H    | -1.361 | -6.172 | 0.280  | BPY   | N    | 3.726  | -2.219 | -2.109 |
| PBIM  | H    | 0.868  | -7.339 | 0.096  | BPY   | N    | 5.005  | -0.900 | -0.217 |
| PBIM  | C    | -0.472 | -4.213 | 0.157  | PQH2  | C    | -5.041 | -2.175 | -1.210 |
| PBIM  | H    | -1.412 | -3.680 | 0.237  | PQH2  | C    | -5.695 | -2.225 | -2.458 |
| PBIM  | N    | 1.926  | -4.126 | -0.066 | PQH2  | C    | -3.655 | -1.914 | -1.170 |
| RU    | Ru   | 3.642  | -2.444 | -0.046 | PQH2  | C    | -4.971 | -1.979 | -3.637 |
| BPY   | H    | 4.508  | -3.066 | 5.841  | PQH2  | C    | -2.949 | -1.704 | -2.364 |
| BPY   | C    | 4.317  | -2.950 | 4.778  | PQH2  | C    | -3.592 | -1.724 | -3.603 |
| BPY   | C    | 3.211  | -2.179 | 4.325  | PQH2  | H    | -1.882 | -1.507 | -2.311 |
| BPY   | C    | 5.151  | -3.560 | 3.843  | PQH2  | O    | -3.036 | -1.880 | 0.040  |
| BPY   | C    | 3.007  | -2.049 | 2.949  | PQH2  | O    | -5.586 | -2.052 | -4.885 |
| BPY   | H    | 2.534  | -1.693 | 5.019  | PQH2  | H    | -6.227 | -1.317 | -4.977 |
| BPY   | C    | 4.899  | -3.409 | 2.451  | PQH2  | C    | -2.830 | -1.478 | -4.882 |
| BPY   | H    | 5.994  | -4.156 | 4.177  | PQH2  | H    | -2.814 | -2.369 | -5.521 |
| BPY   | H    | 2.189  | -1.460 | 2.551  | PQH2  | H    | -3.294 | -0.683 | -5.476 |
| BPY   | C    | 5.667  | -4.040 | 1.401  | PQH2  | H    | -1.795 | -1.194 | -4.673 |
| BPY   | C    | 6.774  | -4.909 | 1.619  | PQH2  | H    | -2.043 | -1.663 | -0.041 |
| BPY   | C    | 5.880  | -4.377 | -0.947 | PQH2  | C    | -7.171 | -2.544 | -2.538 |
| BPY   | C    | 7.424  | -5.506 | 0.543  | PQH2  | H    | -7.792 | -1.670 | -2.298 |



|     |   |       |        |        |      |   |        |        |        |
|-----|---|-------|--------|--------|------|---|--------|--------|--------|
| BPY | H | 7.108 | -5.107 | 2.632  | PQH2 | H | -7.438 | -2.870 | -3.545 |
| BPY | C | 6.966 | -5.238 | -0.779 | PQH2 | H | -7.451 | -3.333 | -1.834 |
| BPY | H | 5.504 | -4.139 | -1.936 | PQH2 | C | -5.801 | -2.406 | 0.075  |
| BPY | H | 8.269 | -6.168 | 0.711  | PQH2 | H | -5.169 | -2.183 | 0.935  |
| BPY | H | 7.447 | -5.677 | -1.647 | PQH2 | H | -6.698 | -1.778 | 0.134  |
| BPY | C | 5.581 | -0.225 | 0.819  | PQH2 | H | -6.138 | -3.446 | 0.170  |
| BPY | C | 6.545 | 0.768  | 0.633  |      |   |        |        |        |

**Table S5. Partial charges used for the solvent reorganization energy calculations**  
a) UQH<sub>2</sub> superimposed full system model

| group | atom | charge         |        |        |        | group | atom | charge         |        |        |        |
|-------|------|----------------|--------|--------|--------|-------|------|----------------|--------|--------|--------|
|       |      | diabatic state |        |        |        |       |      | diabatic state |        |        |        |
|       |      | 1a             | 1b     | 2a     | 2b     |       |      | 1a             | 1b     | 2a     | 2b     |
| PBIM  | C    | 0.294          | 0.246  | 0.294  | 0.246  | BPY   | C    | 0.133          | 0.133  | 0.133  | 0.133  |
| PBIM  | C    | 0.398          | 0.401  | 0.398  | 0.401  | BPY   | H    | 0.083          | 0.083  | 0.083  | 0.083  |
| PBIM  | C    | -0.305         | -0.271 | -0.305 | -0.271 | BPY   | C    | 0.335          | 0.335  | 0.335  | 0.335  |
| PBIM  | C    | -0.147         | -0.104 | -0.147 | -0.104 | BPY   | C    | -0.405         | -0.405 | -0.405 | -0.405 |
| PBIM  | C    | -0.168         | -0.100 | -0.168 | -0.100 | BPY   | H    | 0.007          | 0.007  | 0.007  | 0.007  |
| PBIM  | C    | -0.259         | -0.267 | -0.259 | -0.267 | BPY   | C    | 0.335          | 0.335  | 0.335  | 0.335  |
| PBIM  | C    | 0.415          | 0.373  | 0.415  | 0.373  | BPY   | H    | 0.094          | 0.094  | 0.094  | 0.094  |
| PBIM  | H    | 0.114          | 0.152  | 0.114  | 0.152  | BPY   | C    | -0.405         | -0.405 | -0.405 | -0.405 |
| PBIM  | H    | 0.066          | 0.100  | 0.066  | 0.100  | BPY   | C    | 0.133          | 0.133  | 0.133  | 0.133  |
| PBIM  | H    | 0.067          | 0.099  | 0.067  | 0.099  | BPY   | H    | 0.094          | 0.094  | 0.094  | 0.094  |
| PBIM  | H    | 0.103          | 0.141  | 0.103  | 0.141  | BPY   | C    | 0.409          | 0.409  | 0.409  | 0.409  |
| PBIM  | N    | -0.706         | -0.619 | -0.706 | -0.619 | BPY   | C    | -0.460         | -0.460 | -0.460 | -0.460 |
| PBIM  | N    | -0.730         | -0.590 | -0.730 | -0.590 | BPY   | H    | 0.007          | 0.007  | 0.007  | 0.007  |
| PBIM  | C    | 0.469          | 0.469  | 0.469  | 0.469  | BPY   | H    | -0.057         | -0.057 | -0.057 | -0.057 |
| PBIM  | C    | 0.353          | 0.398  | 0.353  | 0.398  | BPY   | H    | 0.083          | 0.083  | 0.083  | 0.083  |
| PBIM  | C    | 0.104          | 0.180  | 0.104  | 0.180  | BPY   | N    | -0.573         | -0.573 | -0.573 | -0.573 |
| PBIM  | C    | -0.375         | -0.354 | -0.375 | -0.354 | BPY   | N    | -0.573         | -0.573 | -0.573 | -0.573 |
| PBIM  | H    | -0.016         | 0.011  | -0.016 | 0.011  | BPY   | N    | -0.637         | -0.637 | -0.637 | -0.637 |
| PBIM  | H    | 0.039          | 0.059  | 0.039  | 0.059  | BPY   | N    | -0.637         | -0.637 | -0.637 | -0.637 |
| PBIM  | H    | 0.096          | 0.130  | 0.096  | 0.130  | UQH2  | C    | 0.005          | -0.050 | 0.080  | 0.025  |
| PBIM  | C    | -0.307         | -0.388 | -0.307 | -0.388 | UQH2  | C    | 0.062          | 0.095  | -0.017 | 0.016  |
| PBIM  | H    | 0.092          | 0.113  | 0.092  | 0.113  | UQH2  | C    | 0.283          | 0.400  | 0.364  | 0.481  |
| PBIM  | N    | -0.597         | -0.572 | -0.597 | -0.572 | UQH2  | C    | 0.156          | 0.048  | 0.332  | 0.224  |
| RU    | Ru   | 3.000          | 3.000  | 2.000  | 2.000  | UQH2  | C    | -0.348         | -0.456 | -0.313 | -0.421 |
| BPY   | H    | 0.048          | 0.048  | 0.048  | 0.048  | UQH2  | C    | 0.009          | 0.015  | 0.051  | 0.057  |
| BPY   | C    | 0.199          | 0.199  | 0.199  | 0.199  | UQH2  | H    | 0.191          | 0.132  | 0.242  | 0.183  |
| BPY   | C    | -0.359         | -0.359 | -0.359 | -0.359 | UQH2  | O    | -0.514         | -0.667 | -0.333 | -0.485 |
| BPY   | C    | -0.410         | -0.410 | -0.410 | -0.410 | UQH2  | O    | -0.477         | -0.519 | -0.432 | -0.473 |
| BPY   | C    | 0.413          | 0.413  | 0.413  | 0.413  | UQH2  | H    | 0.364          | 0.342  | 0.421  | 0.399  |
| BPY   | H    | 0.127          | 0.127  | 0.127  | 0.127  | UQH2  | O    | -0.307         | -0.367 | -0.277 | -0.336 |
| BPY   | C    | 0.417          | 0.417  | 0.417  | 0.417  | UQH2  | O    | -0.314         | -0.260 | -0.176 | -0.122 |

|     |   |        |        |        |        |      |   |        |        |        |        |
|-----|---|--------|--------|--------|--------|------|---|--------|--------|--------|--------|
| BPY | H | 0.139  | 0.139  | 0.139  | 0.139  | UQH2 | C | 0.186  | 0.253  | 0.043  | 0.110  |
| BPY | H | 0.000  | 0.000  | 0.000  | 0.000  | UQH2 | H | 0.006  | -0.028 | 0.061  | 0.027  |
| BPY | C | 0.417  | 0.417  | 0.417  | 0.417  | UQH2 | H | 0.022  | -0.027 | 0.101  | 0.052  |
| BPY | C | -0.410 | -0.410 | -0.410 | -0.410 | UQH2 | H | 0.013  | -0.034 | 0.068  | 0.021  |
| BPY | C | 0.413  | 0.413  | 0.413  | 0.413  | UQH2 | C | 0.188  | 0.150  | -0.059 | -0.096 |
| BPY | C | 0.199  | 0.199  | 0.199  | 0.199  | UQH2 | H | 0.024  | -0.026 | 0.117  | 0.067  |
| BPY | H | 0.139  | 0.139  | 0.139  | 0.139  | UQH2 | H | 0.008  | -0.029 | 0.140  | 0.103  |
| BPY | C | -0.359 | -0.359 | -0.359 | -0.359 | UQH2 | H | 0.007  | 0.029  | 0.081  | 0.103  |
| BPY | H | 0.000  | 0.000  | 0.000  | 0.000  | UQH2 | C | -0.005 | 0.054  | -0.082 | -0.023 |
| BPY | H | 0.048  | 0.048  | 0.048  | 0.048  | UQH2 | H | 0.026  | -0.017 | 0.075  | 0.031  |
| BPY | H | 0.127  | 0.127  | 0.127  | 0.127  | UQH2 | H | 0.030  | -0.013 | 0.073  | 0.029  |
| BPY | C | 0.409  | 0.409  | 0.409  | 0.409  | UQH2 | H | 0.009  | -0.025 | 0.061  | 0.027  |
| BPY | C | -0.460 | -0.460 | -0.460 | -0.460 | UQH2 | H | 0.376  | 0.392  | 0.376  | 0.392  |
| BPY | H | -0.057 | -0.057 | -0.057 | -0.057 |      |   |        |        |        |        |

b) PQH<sub>2</sub> superimposed full system model

| group | atom | charge         |        |        |        | group | atom | charge         |        |        |        |
|-------|------|----------------|--------|--------|--------|-------|------|----------------|--------|--------|--------|
|       |      | diabatic state |        |        |        |       |      | diabatic state |        |        |        |
|       |      | 1a             | 1b     | 2a     | 2b     |       |      | 1a             | 1b     | 2a     | 2b     |
| PBIM  | C    | 0.294          | 0.246  | 0.294  | 0.246  | BPY   | H    | -0.057         | -0.057 | -0.057 | -0.057 |
| PBIM  | C    | 0.398          | 0.401  | 0.398  | 0.401  | BPY   | C    | 0.133          | 0.133  | 0.133  | 0.133  |
| PBIM  | C    | -0.305         | -0.271 | -0.305 | -0.271 | BPY   | H    | 0.083          | 0.083  | 0.083  | 0.083  |
| PBIM  | C    | -0.147         | -0.104 | -0.147 | -0.104 | BPY   | C    | 0.335          | 0.335  | 0.335  | 0.335  |
| PBIM  | C    | -0.168         | -0.100 | -0.168 | -0.100 | BPY   | C    | -0.405         | -0.405 | -0.405 | -0.405 |
| PBIM  | C    | -0.259         | -0.267 | -0.259 | -0.267 | BPY   | H    | 0.007          | 0.007  | 0.007  | 0.007  |
| PBIM  | C    | 0.415          | 0.373  | 0.415  | 0.373  | BPY   | C    | 0.335          | 0.335  | 0.335  | 0.335  |
| PBIM  | H    | 0.114          | 0.152  | 0.114  | 0.152  | BPY   | H    | 0.094          | 0.094  | 0.094  | 0.094  |
| PBIM  | H    | 0.066          | 0.100  | 0.066  | 0.100  | BPY   | C    | -0.405         | -0.405 | -0.405 | -0.405 |
| PBIM  | H    | 0.067          | 0.099  | 0.067  | 0.099  | BPY   | C    | 0.133          | 0.133  | 0.133  | 0.133  |
| PBIM  | H    | 0.103          | 0.141  | 0.103  | 0.141  | BPY   | H    | 0.094          | 0.094  | 0.094  | 0.094  |
| PBIM  | N    | -0.706         | -0.619 | -0.706 | -0.619 | BPY   | C    | 0.409          | 0.409  | 0.409  | 0.409  |
| PBIM  | N    | -0.730         | -0.590 | -0.730 | -0.590 | BPY   | C    | -0.460         | -0.460 | -0.460 | -0.460 |
| PBIM  | C    | 0.469          | 0.469  | 0.469  | 0.469  | BPY   | H    | 0.007          | 0.007  | 0.007  | 0.007  |
| PBIM  | C    | 0.353          | 0.398  | 0.353  | 0.398  | BPY   | H    | -0.057         | -0.057 | -0.057 | -0.057 |
| PBIM  | C    | 0.104          | 0.180  | 0.104  | 0.180  | BPY   | H    | 0.083          | 0.083  | 0.083  | 0.083  |
| PBIM  | C    | -0.375         | -0.354 | -0.375 | -0.354 | BPY   | N    | -0.573         | -0.573 | -0.573 | -0.573 |
| PBIM  | H    | -0.016         | 0.011  | -0.016 | 0.011  | BPY   | N    | -0.573         | -0.573 | -0.573 | -0.573 |
| PBIM  | H    | 0.039          | 0.059  | 0.039  | 0.059  | BPY   | N    | -0.637         | -0.637 | -0.637 | -0.637 |
| PBIM  | H    | 0.096          | 0.130  | 0.096  | 0.130  | BPY   | N    | -0.637         | -0.637 | -0.637 | -0.637 |
| PBIM  | C    | -0.307         | -0.388 | -0.307 | -0.388 | PQH2  | C    | -0.082         | -0.205 | 0.004  | -0.120 |
| PBIM  | H    | 0.092          | 0.113  | 0.092  | 0.113  | PQH2  | C    | -0.122         | -0.116 | -0.123 | -0.118 |
| PBIM  | N    | -0.597         | -0.572 | -0.597 | -0.572 | PQH2  | C    | 0.260          | 0.454  | 0.299  | 0.492  |
| RU    | Ru   | 3.000          | 3.000  | 2.000  | 2.000  | PQH2  | C    | 0.141          | 0.039  | 0.287  | 0.185  |
| BPY   | H    | 0.048          | 0.048  | 0.048  | 0.048  | PQH2  | C    | -0.403         | -0.476 | -0.303 | -0.376 |
| BPY   | C    | 0.199          | 0.199  | 0.199  | 0.199  | PQH2  | C    | 0.106          | 0.105  | 0.101  | 0.100  |

|     |   |        |        |        |        |      |   |        |        |        |        |
|-----|---|--------|--------|--------|--------|------|---|--------|--------|--------|--------|
| BPY | C | -0.359 | -0.359 | -0.359 | -0.359 | PQH2 | H | 0.162  | 0.121  | 0.204  | 0.163  |
| BPY | C | -0.410 | -0.410 | -0.410 | -0.410 | PQH2 | O | -0.520 | -0.684 | -0.303 | -0.466 |
| BPY | C | 0.413  | 0.413  | 0.413  | 0.413  | PQH2 | O | -0.514 | -0.554 | -0.432 | -0.472 |
| BPY | H | 0.127  | 0.127  | 0.127  | 0.127  | PQH2 | H | 0.394  | 0.368  | 0.423  | 0.397  |
| BPY | C | 0.417  | 0.417  | 0.417  | 0.417  | PQH2 | C | -0.082 | -0.047 | -0.118 | -0.083 |
| BPY | H | 0.139  | 0.139  | 0.139  | 0.139  | PQH2 | H | 0.043  | 0.005  | 0.081  | 0.043  |
| BPY | H | 0.000  | 0.000  | 0.000  | 0.000  | PQH2 | H | 0.043  | 0.005  | 0.081  | 0.043  |
| BPY | C | 0.417  | 0.417  | 0.417  | 0.417  | PQH2 | H | 0.025  | -0.004 | 0.071  | 0.041  |
| BPY | C | -0.410 | -0.410 | -0.410 | -0.410 | PQH2 | H | 0.390  | 0.392  | 0.390  | 0.392  |
| BPY | C | 0.413  | 0.413  | 0.413  | 0.413  | PQH2 | C | 0.069  | 0.097  | 0.065  | 0.093  |
| BPY | C | 0.199  | 0.199  | 0.199  | 0.199  | PQH2 | H | -0.007 | -0.044 | 0.025  | -0.011 |
| BPY | H | 0.139  | 0.139  | 0.139  | 0.139  | PQH2 | H | -0.007 | -0.044 | 0.025  | -0.011 |
| BPY | C | -0.359 | -0.359 | -0.359 | -0.359 | PQH2 | H | 0.019  | -0.005 | 0.045  | 0.021  |
| BPY | H | 0.000  | 0.000  | 0.000  | 0.000  | PQH2 | C | 0.078  | 0.116  | -0.015 | 0.023  |
| BPY | H | 0.048  | 0.048  | 0.048  | 0.048  | PQH2 | H | 0.011  | -0.021 | 0.055  | 0.022  |
| BPY | H | 0.127  | 0.127  | 0.127  | 0.127  | PQH2 | H | -0.002 | -0.054 | 0.069  | 0.017  |
| BPY | C | 0.409  | 0.409  | 0.409  | 0.409  | PQH2 | H | -0.002 | -0.054 | 0.070  | 0.018  |
| BPY | C | -0.460 | -0.460 | -0.460 | -0.460 |      |   |        |        |        |        |

Abbreviations: PBIM, 2-(2-pyridyl)-benzimidazolate; RU, ruthenium ion; BPY, 2,2'-dipyridyl; UQH2, 2,3-dimethoxy-5-methyl-1,4-benzoquinol; PQH2, 2,3,5-trimethyl-1,4-benzoquinol;

**Table S6. Molecular mechanical parameters for gas phase proton potential energy curves.**

| Parameters         | UQH <sub>2</sub> | PQH <sub>2</sub> |
|--------------------|------------------|------------------|
| $D_{OH}$           | 78.5             | 78.5             |
| $D_{NH}$           | 81.0             | 81.0             |
| $R_{OH}^0$ (1a)    | 0.97             | 0.96             |
| $R_{NH}^0$ (1b)    | 1.01             | 1.01             |
| $R_{OH}^0$ (2a)    | 0.98             | 0.97             |
| $R_{NH}^0$ (2b)    | 1.01             | 1.01             |
| $\omega_{OH}$ (1a) | 3607             | 3685             |
| $\omega_{NH}$ (1b) | 3545             | 3545             |
| $\omega_{OH}$ (2a) | 3513             | 3622             |
| $\omega_{NH}$ (2b) | 3545             | 3545             |
| $\beta_{OH}$ (1a)  | 2.58             | 2.64             |
| $\beta_{NH}$ (1b)  | 2.49             | 2.49             |
| $\beta_{OH}$ (2a)  | 2.51             | 2.59             |
| $\beta_{NH}$ (2b)  | 2.49             | 2.49             |
| $D'_{NH}$ (1a)     | 2335.5           | 1266.31          |
| $D'_{OH}$ (1b)     | 4227.32          | 2883.26          |
| $D'_{NH}$ (2a)     | 1596.06          | 764.065          |

|                           |            |            |
|---------------------------|------------|------------|
| $D'_{\text{OH}}$ (2b)     | 605.573    | 442.146    |
| $\beta'_{\text{NH}}$ (1a) | 2.5        | 2.5        |
| $\beta'_{\text{OH}}$ (1b) | 2.5        | 2.5        |
| $\beta'_{\text{NH}}$ (2a) | 2.5        | 2.5        |
| $\beta'_{\text{OH}}$ (2b) | 2.5        | 2.5        |
| $\Delta E_{1b}$           | 64.262     | 73.0227    |
| $\Delta E_{2a}$           | -4.680338  | -7.126177  |
| $\Delta E_{2b}$           | -40.058138 | -34.283077 |
| $V^{\text{PT}}$ (1a/1b)   | 167.5      | 119.804    |
| $V^{\text{PT}}$ (2a/2b)   | 99.8       | 82.4474    |

Parameters defined in Ishikita, H.; Soudackov, A. V.; and Hammes-Schiffer, S. *J. Am. Chem. Soc.* **2007**, *129*, 11146-11152.

$D$ ,  $D'$ ,  $\Delta E$ ,  $V^{\text{PT}}$  in units of kcal/mol,  $R^0$  in units of Å,  $\omega$  in units of  $\text{cm}^{-1}$ ,  $\beta$  and  $\beta'$  in units of Å<sup>-1</sup>.

$R^0$  and  $\omega$  for OH and NH obtained from DFT calculations (B3LYP/6-31G\*\*) of UQH<sub>2</sub>, PQH<sub>2</sub>, and pbimH.

$\omega$  is used for calculating  $\beta$  and is corrected with 0.9619 scaling factor (Andersson, M.P.; Uvdal, P. *J. Phys. Chem. A* **2005**, *109*, 2937-2941).

$D_{\text{OH}} = 78.5$  kcal/mol (de Heer, M.I.; Korth, H.G.; Mulder, P. *J. Org. Chem.* **1999**, *64*, 6969-6975).

$D_{\text{NH}} = 81.0$  kcal/mol (Clyne, M.A.A.; Thrush, B.A. *Proc. Chem. Soc.* **1962**, 227).

$\beta = 2.5$  Å<sup>-1</sup> (Warshel, A. *Computer Modeling of Chemical Reaction in Enzymes and Solutions*, John Wiley & Sons, Inc, New York, 1991).

**Table S7.** Analysis of the contributions of pairs of reactant/product vibronic states  $\mu/\nu$  for UQH<sub>2</sub> and PQH<sub>2</sub> systems at 320 K with parameters given in Table 2. The free energies  $\Delta G_{\mu\nu}^0$  and  $\Delta G_{\mu\nu}^\ddagger$  are given in units of kcal/mol.

| Quinol           | Isotope | $\mu$ | $\nu$ | %<br>Cont. | $P_\mu$   | $\Delta G_{\mu\nu}^0$ | $\Delta G_{\mu\nu}^\ddagger$ | $e^{-\Delta G_{\mu\nu}^\ddagger/k_B T}$ | $S_{\mu\nu}^2$       |
|------------------|---------|-------|-------|------------|-----------|-----------------------|------------------------------|-----------------------------------------|----------------------|
| UQH <sub>2</sub> | H       | 0     | 0     | 9.36       | 0.9999797 | -3.67                 | 1.79                         | $6.0 \times 10^{-2}$                    | $8.2 \times 10^{-4}$ |
|                  |         | 0     | 1     | 89.9       | 0.9999797 | 2.40                  | 2.89                         | $1.1 \times 10^{-2}$                    | $4.5 \times 10^{-2}$ |
|                  |         | 1     | 2     | 0.73       | 0.0000203 | -0.74                 | 0.017                        | $9.7 \times 10^{-1}$                    | $1.9 \times 10^{-1}$ |
|                  | D       | 0     | 0     | 0.27       | 0.999722  | -3.67                 | 1.79                         | $6.0 \times 10^{-2}$                    | $1.1 \times 10^{-5}$ |
|                  |         | 0     | 1     | 82.1       | 0.999722  | 1.01                  | 1.01                         | $2.0 \times 10^{-1}$                    | $9.9 \times 10^{-4}$ |
|                  |         | 1     | 2     | 16.3       | 0.000278  | -0.53                 | 0.056                        | $9.2 \times 10^{-1}$                    | $1.6 \times 10^{-1}$ |
|                  |         | 1     | 3     | 1.24       | 0.000278  | 1.73                  | 1.87                         | $5.3 \times 10^{-2}$                    | $2.1 \times 10^{-2}$ |
| PQH <sub>2</sub> | H       | 0     | 0     | 31         | 0.999993  | -3.34                 | 1.09                         | $1.8 \times 10^{-1}$                    | $1.2 \times 10^{-4}$ |
|                  |         | 0     | 1     | 66.7       | 0.999993  | 3.00                  | 3.78                         | $2.5 \times 10^{-3}$                    | $1.9 \times 10^{-2}$ |
|                  |         | 1     | 2     | 2.33       | 0.000007  | -1.15                 | $1.2 \times 10^{-4}$         | 1.00                                    | $2.4 \times 10^{-1}$ |
|                  |         | 1     | 3     | 0.03       | 0.000007  | 1.64                  | 1.70                         | $6.9 \times 10^{-2}$                    | $4.0 \times 10^{-2}$ |
|                  | D       | 0     | 0     | 0.55       | 0.999854  | -3.34                 | 1.09                         | $1.8 \times 10^{-1}$                    | $6.7 \times 10^{-7}$ |
|                  |         | 0     | 1     | 52.3       | 0.999854  | 1.53                  | 1.56                         | $8.6 \times 10^{-2}$                    | $1.3 \times 10^{-4}$ |
|                  |         | 1     | 2     | 34.6       | 0.000146  | -0.22                 | 0.18                         | $7.5 \times 10^{-1}$                    | $7.1 \times 10^{-2}$ |
|                  |         | 1     | 3     | 12.4       | 0.000146  | 1.54                  | 1.58                         | $8.4 \times 10^{-2}$                    | $2.3 \times 10^{-1}$ |

**Estimation of the driving forces (provided by Jon Cape, personal communication):**

Useful Formulas:

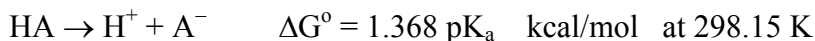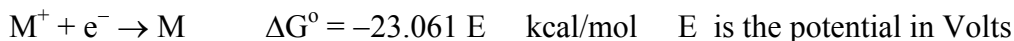

$$E = E^\circ - 0.05916 \text{ pH} \quad E^\circ \text{ is standard potential in Volts at pH=0}$$

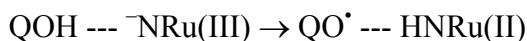

For consistency, we are doing everything in water for the ground state Ru complex (i.e., not the MLCT state in MeCN). We will assume that this reaction occurs at pH=0 and that the redox potentials are calculated relative to SHE, but these two effects will cancel out in the final calculation of the total driving force, which involves both a protonation and a deprotonation, and both an oxidation and a reduction.

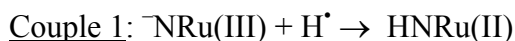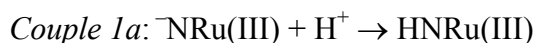

$$\text{pK}_a = 3.2$$

Jon Cape's CV experiment and thermodynamic cycle analysis

$$\begin{aligned} \Delta G^\circ &= -1.368 (\text{pK}_a - \text{pH}) \text{ kcal/mol} \\ &= -4.378 \text{ kcal/mol} \end{aligned}$$

at pH = 0

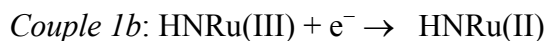

$E(\text{Ru}^{\text{III/II}})$  for protonated species is 0.875 vs SHE  
Jon Cape's CV experiment

$$\begin{aligned} \Delta G^\circ &= -23.061 E \text{ kcal/mol} \quad E \text{ is the reduction potential in Volts} \\ &= -20.178 \end{aligned}$$

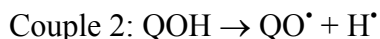

Redox potential is available for the combined electron/proton transfer.  
Using Jon Cape's equations, combined with the experimental data from

Table S2 of Supporting Information for J. L. Cape, M. K. Bowman, D. M. Kramer, *Phytochemistry* 67 (2006) 1781-1788.

$$E(\text{UQH}^*/\text{UQH}_2) = 0.805$$

$$E(\text{TMQH}^*/\text{TMQH}_2) = 0.869$$

in H<sub>2</sub>O at pH=0

$$\Delta G^\circ = 23.061 E \quad \text{kcal/mol}$$

$$= 18.564 \text{ kcal/mol for UQH}$$

$$= 20.040 \text{ kcal/mol for TMQ}$$

Driving force for total PCET reaction is the sum for Couples 1a, 1b, and 2:

For UQH:

$$\Delta G^\circ = (-4.378 - 20.178 + 18.564) \text{ kcal/mol}$$

$$= -6.0 \text{ kcal/mol}$$

In units of V, E = 0.260 V

For TMQH:

$$\Delta G^\circ = (-4.378 - 20.178 + 20.040) \text{ kcal/mol}$$

$$= -4.5 \text{ kcal/mol}$$

In units of V, E = 0.196 V

Calculation of redox potentials and pKas for Ru complex:

Jon Cape ran the CV for the Ru compound in both 1M triflic acid and in 250 mM Borate buffer (pH 9) to obtain the Ru<sup>III/II</sup> couples for the protonated and deprotonated forms in aqueous solution. From this he calculated the following cycle: (personal communication, Jon Cape)

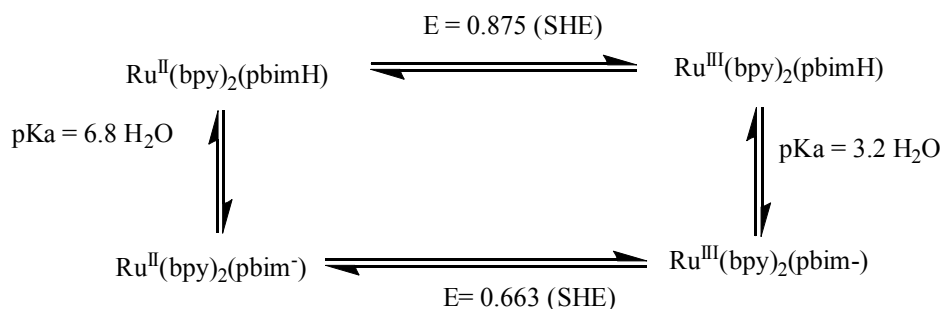

Calculation of Redox Potential for Semiquinone:

- (1)  $\text{Q} + 2\text{H} \rightarrow \text{QH}_2$
- (2)  $\text{Q} + \text{H} \rightarrow \text{QH}^\cdot$

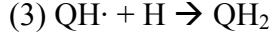

From the Nernst equation:

$$E_1 = E_1^0 + \frac{RT}{2F} \ln \frac{[Q]}{[\text{QH}_2]}$$

$$E_2 = E_2^0 + \frac{RT}{F} \ln \frac{[Q]}{[\text{QH}\cdot]}$$

$$E_3 = E_3^0 + \frac{RT}{F} \ln \frac{[\text{QH}\cdot]}{[\text{QH}_2]}$$

At equilibrium  $E_1=E_2=E_3$  since all three redox reactions are at the same ambient potential. Therefore,  $E_2 + E_3 = 2E_1$  so

$$E_2^0 + \frac{RT}{F} \ln \frac{[Q]}{[\text{QH}\cdot]} + E_3^0 + \frac{RT}{F} \ln \frac{[\text{QH}\cdot]}{[\text{QH}_2]} = 2E_1^0 + \frac{RT}{F} \ln \frac{[Q]}{[\text{QH}_2]}$$

$$\text{so } E_2^0 + E_3^0 = 2E_1^0$$

$$\text{Rearranging, we get: } E_3^0 = 2E_1^0 - E_2^0.$$

We can define these redox potentials as follows (assumed to be measured at pH=0):

$$E_1^0 = E(Q/\text{QH}_2)$$

$$E_2^0 = E(Q/\text{QH}\cdot)$$

$$E_3^0 = E(\text{QH}\cdot/\text{QH}_2)$$

Now we get another expression for  $E_2^0$ . The second reaction can be broken into 2 steps:

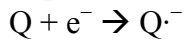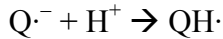

$$E_2^0 = E(Q/\text{Q}\cdot^-) + 0.059(\text{pK}_{a,\text{SQ}} - \text{pH}), \text{ where pH} = 0 \text{ here.}$$

We also need to calculate  $E_1^0$ , which is at pH=0, from  $E(Q/\text{QH}_2)$  measured at pH=7.

$$E_1^0 = E(Q/\text{QH}_2, \text{pH}) + 0.059 \text{pH} = E(Q/\text{QH}_2, \text{pH} = 7) + 0.059(7)$$

$$E(\text{QH}\cdot/\text{QH}_2) = 2E(Q/\text{QH}_2, \text{pH}=7) + 2(0.059)(7) - E(Q/\text{Q}\cdot^-) - 0.059(\text{pK}_{a,\text{SQ}})$$

Using numbers from SI of the Phytochemistry 2006 paper:

UQH:

$$E(\text{QH}\cdot/\text{QH}_2) = 2(0.117) + 2(0.059)(7) - (-0.075) - 0.059(5.6) = 0.805 \text{ V}$$

TMQH:

$$E(\text{QH}\cdot/\text{QH}_2) = 2(0.085) + 2(0.059)(7) - (-0.165) - 0.059(4.95) = 0.869 \text{ V}$$

## References

- (1) Andersson, M.P.; Uvdal, P. *J. Phys. Chem. A* **2005**, 109, 2937-2941
- (2) de Heer, M.I.; Korth, H.G.; Mulder, P. *J. Org. Chem.* **1999**, 64, 6969-6975
- (3) Ishikita, H.; Soudackov, A. V.; and Hammes-Schiffer, S. *J. Am. Chem. Soc.* **2007**, 129, 11146-11152
- (4) M.A.A.; Thrush, B.A. *Proc. Chem. Soc.* **1962**, 227.
- (5) J. L. Cape, M. K. Bowman, D. M. Kramer, *Phytochemistry* 67 (2006) 1781-1788.
- (6) Warshel, A. *Computer Modeling of Chemical Reaction in Enzymes and Solutions*, John Wiley & Sons, Inc, New York, 1991

### Complete reference 29:

Frisch, M. J.; Trucks, G. W.; Schlegel, H. B.; Scuseria, G. E.; Robb, M. A.; Cheeseman, J. R.; Montgomery, J. A., Jr.; Vreven, T.; Kudin, K. N.; Burant, J. C.; Millam, J. M.; Iyengar, S. S.; Tomasi, J.; Barone, V.; Mennucci, B.; Cossi, M.; Scalmani, G.; Rega, N.; Petersson, G. A.; Nakatsuji, H.; Hada, M.; Ehara, M.; Toyota, K.; Fukuda, R.; Hasegawa, J.; Ishida, M.; Nakajima, T.; Honda, Y.; Kitao, O.; Nakai, H.; Klene, M.; Li, X.; Knox, J. E.; Hratchian, H. P.; Cross, J. B.; Adamo, C.; Jaramillo, J.; Gomperts, R.; Stratmann, R. E.; Yazyev, O.; Austin, A. J.; Cammi, R.; Pomelli, C.; Ochterski, J. W.; Ayala, P. Y.; Morokuma, K.; Voth, G. A.; Salvador, P.; Dannenberg, J. J.; Zakrzewski, V. G.; Dapprich, S.; Daniels, A. D.; Strain, M. C.; Farkas, O.; Malick, D. K.; Rabuck, A. D.; Raghavachari, K.; Foresman, J. B.; Ortiz, J. V.; Cui, Q.; Baboul, A. G.; Clifford, S.; Cioslowski, J.; Stefanov, B. B.; Liu, G.; Liashenko, A.; Piskorz, P.; Komaromi, I.; Martin, R. L.; Fox, D. J.; Keith, T.; Al-Laham, M. A.; Peng, C. Y.; Nanayakkara, A.; Challacombe, M.; Gill, P. M. W.; Johnson, B.; Chen, W.; Wong, M. W.; Gonzalez, C.; Pople, J. A. *Gaussian 03*, revision C.03; Gaussian, Inc.: Pittsburgh, PA, 2003.
